# Supplementary material for: A cross-sectional survey exploring the knowledge, experiences and attitudes of Australian pharmacists toward medicinal cannabis
Source: Springer Nature journal article supplement (doi:10.1007/s11096-022-01519-z), 2022-11-29
Supplement: MOESM1 [file 11096_2022_1519_MOESM1_ESM.pdf]

# A Cross-Sectional Survey Exploring the Knowledge, Experiences and Attitudes of Australian Pharmacists Toward Medicinal Cannabis

Zeeta Bawa<sup>1-3</sup>, Bandana Saini<sup>4,5</sup>, Danielle McCartney<sup>1-3</sup>, Miguel Bedoya Perez<sup>1-3</sup>, Andrew J. McLachlan<sup>4</sup>, Iain S. McGregor<sup>1-3</sup>

<sup>1</sup> The University of Sydney, Lambert Initiative for Cannabinoid Therapeutics, Sydney, New South Wales, Australia

<sup>2</sup> The University of Sydney, Brain and Mind Centre, Sydney, New South Wales, Australia

<sup>3</sup> The University of Sydney, Faculty of Science, School of Psychology, Sydney, New South Wales, Australia

<sup>4</sup> The University of Sydney, Sydney Pharmacy School, Sydney, New South Wales, Australia

<sup>5</sup> Woolcock Institute of Medical Research, Sydney, New South Wales, Australia

\***Correspondence:** Professor Iain S. McGregor; contact: iain.mcgregor@sydney.edu.au

## Online Resource 1

Community Pharmacists and Cannabidiol (CBD) Online Survey  
Project Number: 2021/149

### PARTICIPANT QUESTIONNAIRE

**Section 1: The following section collects anonymous demographic information. We ask this to explore if professional education needs vary with experience or locality.**

**1. What is your age?**

- 18-24 years
- 25-34 years
- 35-44 years
- 45-54 years
- 55-64 years
- 65+ years

**2. How would you describe your gender?**

- Male
- Female
- Other
- Prefer not to answer

**3. Where in Australia do you practice?**

- New South Wales
- Victoria
- South Australia
- Western Australia
- Queensland
- Australian Capital Territory
- Northern Territory
- Tasmania

**4. What is your main role in community pharmacy? (Select all that apply)**

- Intern pharmacist
- Pharmacist employee
- Pharmacist-in-Charge
- Pharmacy owner
- Locum pharmacist
- AACP Accredited Pharmacist
- Other, please specify

**5. How many years of experience do you have as a pharmacist?**

- Less than 1 year
- 1-5 years
- 6-10 years
- 11-15 years
- 16-19 years
- 20 or more years

**6. What is the setting of your pharmacy? (Select the best option)**

- Shopping centre
- Medical centre
- Shopping strip
- Stand-alone pharmacy
- Other, please specify \_\_\_\_\_

**7. How would you best describe the type of pharmacy where you mainly work? (Select the best option)**

- Chain or franchise
- Independent
- Other, please specify \_\_\_\_\_

**8. What best describes the location of your pharmacy? (Select the best option)**

- Major metro city centre
- Major suburban city centre
- Regional town
- Rural or remote town
- Other, please specify \_\_\_\_\_

**9. What is the post code of the main pharmacy where you work?**

- Prefer not to answer
- Comfortable to answer: \_\_\_\_\_

**10. On an average weekday in your pharmacy, what is the total number of prescriptions dispensed? (Select the best option)**

- 0-50
- 51-100
- 101-150
- Over 150
- Unsure

**Section 2: This section explores your pharmacy's current involvement in supply of prescribed medicinal cannabis products, if any. Please note that this includes products containing cannabidiol (CBD)-only, tetrahydrocannabinol (THC)-only and products containing combinations of THC and CBD.**

**11. Regardless of whether you have dispensed medicinal cannabis products or not, what are your feelings towards supply? (Select the best option)**

- I am not comfortable supplying medicinal cannabis products and do not wish to in the future
- I am not comfortable supplying medicinal cannabis products now but am interested in supply in the future
- I am neither comfortable nor uncomfortable supplying medicinal cannabis products
- I am comfortable supplying medicinal cannabis products and wish to in the future

**12. What best describes your experience in relation to the supply of medicinal cannabis products? (Select the best option)**

- My pharmacy does not supply medicinal cannabis products and I have never dispensed them
- My pharmacy does supply medicinal cannabis products but I have never dispensed them
- I have dispensed medicinal cannabis products, but not in the past month
- I have dispensed medicinal cannabis products in the past month

**Questions 13 – 20 will only appear if medicinal cannabis products were dispensed as per Question 11**

**13. In the past two months, approximately how many medicinal cannabis prescriptions did you personally dispense?**

- 1-4
- 5-9
- 10-19
- 20 or more
- Unsure

**14. In the past month, approximately how many medicinal cannabis prescriptions did your pharmacy dispense?**

- 1-4
- 5-9
- 10-19
- 20 or more
- Unsure

**15. Are the majority of medicinal cannabis prescriptions repeats or new prescriptions?**

- Repeats
- New prescriptions
- Unsure

**16. Epidiolex™ is currently the only prescription CBD-only product registered on the Australian Register of Therapeutic Goods (ARTG). Has your pharmacy ever dispensed a prescription for this medication?**

- Yes
- No
- Unsure

**17. Sativex™ is currently the only prescription THC/CBD containing product registered on the Australian Register of Therapeutic Goods (ARTG). Has your pharmacy ever dispensed a prescription for this medication?**

- Yes
- No
- Unsure

**18. If you have insights into why your customers are using medicinal cannabis products, please select up to three indications below. (Select top three)**

- I do not have insights
- Anxiety
- Insomnia
- Chronic non-cancer pain (e.g. arthritis, back pain, neck pain)
- Chronic cancer pain
- Neuropathic pain
- Depression
- Childhood epilepsy
- Spasticity from conditions such as multiple sclerosis
- Other (please specify): \_\_\_\_\_

**19. Are you aware of any customers who have stopped taking prescription medicinal cannabis products because of adverse effects?**

- Yes
- No
- Unsure

**20. In the past 2 weeks at your pharmacy, approximately how many customers have asked you about medicinal cannabis, including CBD products? (Select the best option)**

- Nil
- 1-4
- 5-9
- 10-19
- 20 or more

**21. In the past 3 months at your pharmacy, there has been a steady increase in customers asking about medicinal cannabis products, including CBD products. (Select the best option)**

- True
- False
- Unsure

**Section 3: The following section explores professional education needs specifically relating to CBD products. CBD is the non-intoxicating component of cannabis. As you would be aware, low dose**

CBD products are legally available as *Pharmacist Only* Schedule 3 (S3) products in community pharmacies as of 1 February 2021.

**22. The maximum allowable daily dose of Schedule 3 CBD is 150mg/day (Select the best option)**

- True
- False
- Unsure

**23. There are currently no *Pharmacist Only* S3 registered CBD products on the Australian Register of Therapeutic Goods (ARTG) for sale in community pharmacies. (Select the best option)**

- True
- False
- Unsure

**24. *Pharmacist Only* S3 CBD products are permitted to have up to 5% THC content. (Select the best option)**

- True
- False
- Unsure

**25. *Pharmacist Only* S3 CBD products must be presented in blister packaging. (Select the best option)**

- True
- False
- Unsure

**26. Up until now, the main way of accessing medicinal cannabis products including CBD products has been under the TGA Special-Access Scheme B or Authorised Prescriber Scheme**

- True
- False
- Unsure

**27. The two most common active ingredients of medicinal cannabis include  $\Delta$ -9 tetrahydrocannabinol (THC) which is intoxicating; and cannabidiol (CBD) which is non-intoxicating. (Select the best option)**

- True
- False
- Unsure

**28. The TGA's review of the safety of low dose CBD (up to 60mg/day) had favourable findings. (Select the best option)**

- True
- False
- Unsure

**29. Common side effects of CBD include fatigue, sedation, dizziness and gastrointestinal upsets including nausea, vomiting and diarrhoea. (Select the best option)**

- True
- False
- Unsure

**30. The most common drug-drug interactions of CBD are with clobazam and sodium valproate (Select the best option)**

- True
- False
- Unsure

**31. Hemp refers to varieties of cannabis plants that generally do not contain intoxicating ingredients but are useful for seed and fibre. (Select the best option)**

- True
- False
- Unsure

**32. CBD does not affect the ability to drive. (Select the best option)**

- True
- False
- Unsure

**33. CBD exacerbates the intoxicating effects of alcohol consumption. (Select the best option)**

- True
- False
- Unsure

**34. CBD can be addictive and is contraindicated in people with drug and alcohol problems. (Select the best option)**

- True
- False
- Unsure

**Section 4: The following section explores beliefs, feelings and levels of confidence with respect to medicinal cannabis products and low dose CBD in community pharmacy**

**35. As a pharmacist, do you believe that the accessibility of medicinal cannabis products from community pharmacy is a positive or negative step for the profession?**

- Very positive
- Positive
- Neutral
- Negative
- Very Negative

**36. Please describe why the accessibility of medicinal cannabis products from community pharmacy is a positive or negative step for the profession:**

\_\_\_\_\_

**37. GPs have generally been willing to trial medicinal cannabis products on their patients if suitable. (Select the best option)**

- Strongly Agree
- Agree
- Neutral
- Disagree
- Strongly Disagree

**38. I feel confident discussing customer's enquiries about medicinal cannabis products. (Select the best option)**

- Strongly Agree
- Agree
- Neutral
- Disagree
- Strongly Disagree

**39. There is a stigma associated with the use of medicinal cannabis products. (Select the best option)**

- Strongly Agree
- Agree
- Neutral
- Disagree
- Strongly Disagree

**40. I am aware of the current range of prescribed medicinal cannabis products and their formulations. (Select the best option)**

- Strongly Agree
- Agree
- Neutral
- Disagree
- Strongly Disagree

**41. I support the provision of *Pharmacist Only S3* CBD products to my customers for suitable indications. (Select the best option)**

- Strongly Agree
- Agree
- Neutral
- Disagree
- Strongly Disagree

**42. I would rather a GP make the decision about the suitability of *Pharmacist Only S3* CBD products for my customers. (Select the best option)**

- Strongly Agree
- Agree
- Neutral

- Disagree
- Strongly Disagree

**43. I have a thorough understanding of the TGA's recent scheduling changes affecting low dose CBD products. (Select the best option)**

- Strongly Agree
- Agree
- Neutral
- Disagree
- Strongly Disagree

**44. As a pharmacist, what do you believe are the challenges that your profession will face in implementing *Pharmacist Only S3* CBD products? (Select all that apply)**

- Inadequate margin/profit in selling products
- Opposition from other health care professionals
- Lack of patient medical history
- Patient safety e.g., misuse/abuse/diversion
- Safety of pharmacy staff
- Lack of time for patient counselling
- Lack of advocacy from governing bodies
- Lack of training/resources for pharmacist and staff
- Lack of confidence
- Concerns over medicine efficacy
- Demand for low dose CBD but no registered S3 products currently available
- None of the above
- Others, please specify \_\_\_\_\_

**45. The benefits of *Pharmacist Only S3* access to CBD include (select all that apply)**

- Continuity of care
- Timely initiation of treatment
- Promotes self-management of minor health ailments
- Encourage patient autonomy
- Reduced burden to the health care system
- Better use of pharmacist's expertise
- Improved access to medicinal cannabis products
- None of the above
- Others, please specify: \_\_\_\_\_ -

**Section 5: This section explores what your needs are, as a community pharmacist, in relation to the scheduling changes of CBD products**

**46. I am familiar with where to access resources to support my professional development on medicinal cannabis and the recent *Pharmacist Only S3* CBD scheduling changes (Select the best option)**

- Strongly Agree

- Agree
- Neutral
- Disagree
- Strongly Disagree

**47. I believe that pharmacy curriculums at university should include the topic of cannabis as a therapeutic area (Select the best option)**

- Strongly Agree
- Agree
- Neutral
- Disagree
- Strongly Disagree

**48. I require training/education on medicinal cannabis products and *Pharmacist Only S3* CBD products (Select the best option)**

- Strongly Agree
- Agree
- Neutral
- Disagree
- Strongly Disagree

**49. I have been provided with adequate support and information on medicinal cannabis products and *Pharmacist Only S3* CBD from my pharmacy and professional pharmacy bodies. (Select the best option)**

- Strongly Agree
- Agree
- Neutral
- Disagree
- Strongly Disagree

**50. In the last TWO years, do you recall having undertaken any continuing professional development (CPD) on the topic of medicinal cannabis products? (Select the best option)**

- Yes
- No
- I can't remember

**51. If you were to choose training/education activities, please indicate which would benefit you most? (Select all that apply)**

- Self-learning material and resources
- Virtual webinars or workshops
- Face to face presentations or workshops
- Educational pieces in various pharmacy journals

**If you have any further comments, thoughts or suggestions regarding CBD and community pharmacists, please leave below:**
